# Supplementary material
Source: publisher site journal article supplement (http://kjim.org/upload/media/kjim-2021-458-suppl2.pdf)
Supplement: Supplementary file 1 [file kjim-2021-458-suppl2.pdf]

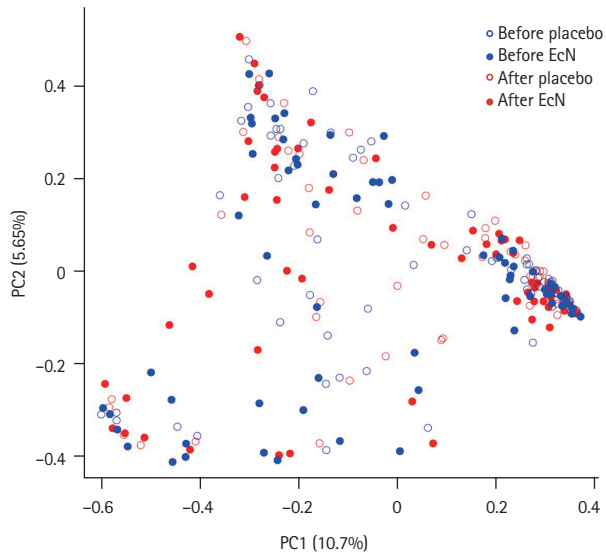

**Supplementary Figure 2.** Principal coordinate (PC) analysis of the  $\beta$ -diversity. The first two components explain 10.7% and 5.67% of the total variance, while the rest of the components explain less than 3.87%. The Yue and Clayton  $\theta$  distances were calculated at the genus level. EcN, *Escherichia coli* Nissle 1917.
